# Supplementary material
Source: PubMed Central journal article supplement (PMC4121478)
Supplement: mmc1.pdf [file mmc1.pdf]

The American Journal of Human Genetics, Volume 94

Supplemental Data

## **Monoallelic and Biallelic Mutations in *MAB21L2***

### **Cause a Spectrum of Major Eye Malformations**

Joe Rainger, Davut Pehlivan, Stefan Johansson, Hemant Bengani, Luis Sanchez-Pulido, Kathleen A. Williamson, Mehmet Ture, Heather Barker, Karen Rosendahl, Jürgen Spranger, Denise Horn, Alison Meynert, James A.B. Floyd, Trine Prescott, Carl A. Anderson, Jacqueline K. Rainger, Ender Karaca, Claudia Gonzaga-Jauregui, Shalini Jhangiani, Donna M. Muzny, Anne Seawright, Dinesh C. Soares, Mira Kharbanda, Victoria Murday, Andrew Finch, UK10K, Baylor-Hopkins Center for Mendelian Genomics, Richard A. Gibbs, Veronica van Heyningen, Martin S. Taylor, Tahsin Yakut, Per M. Knappskog, Matthew E. Hurles, Chris P. Ponting, James R. Lupski, Gunnar Houge, and David R. FitzPatrick

# Supplemental Data

## Figure S1 Alignment of MAB21L2 orthologs

|     |                                                                 |     |                    |
|-----|-----------------------------------------------------------------|-----|--------------------|
| 1   | MIAAQAKLVYQLNKYYTERCQARKAAIAKTIREVCKVSDVLKEVEVQPRFFISSLSEI-     | 59  | Q9Y586 (human)     |
| 1   | MIAAQAKLVYQLNKYYTERCQARKAAIAKTIREVCKVSDVLKEVEVQPRFFISSLSEI-     | 59  | Q8BPP1 (mouse)     |
| 1   | MIAAQAKLVYQLNKYYTERCQARKAAIAKTIREVCKVSDVLKEVEVQPRFFISSLSEI-     | 59  | Q8UUZ1 (zebrafish) |
| 1   | MLGHNQNVVYQVNNYFNKQVHRKVRVTKTVQRIAKVQVEILKEVEAQPRFFINTLSETT     | 60  | Q20054 (C elegans) |
|     | *.: : :***:*:*.: * ** .:***:..*.*.:*****.***.*:***              |     |                    |
| 60  | DARYEGLEVISPTFEFVVLNQMGMVFNVDGSLPGCAVLKLSDRKRSMSLWVEFITA        | 119 | Q9Y586 (human)     |
| 60  | DARYEGLEVISPTFEFVVLNQMGMVFNVDGSLPGCAVLKLSDRKRSMSLWVEFITA        | 119 | Q8BPP1 (mouse)     |
| 60  | DARYEGMEVIAPNEFVVLNQMGMVFNVDGSLPGCAVLKLSDRKRSMSLWVEFITA         | 119 | Q8UUZ1 (zebrafish) |
| 61  | TGRFDGIVVHSPSEYEAVLYLNQMGMVFNVDGDTIQQCAVLKLSDRKRSMSLWVEFITA     | 120 | Q20054 (C elegans) |
|     | .*:.*: * :*.:*.:*****:*****:*****                               |     |                    |
| 120 | SGYLSARKIRSRFQTLVAQAVDKCSYRDVVKMIADTSEVKLRIRERYVQITPAFKCTGI     | 179 | Q9Y586 (human)     |
| 120 | SGYLSARKIRSRFQTLVAQAVDKCSYRDVVKMIADTSEVKLRIRERYVQITPAFKCTGI     | 179 | Q8BPP1 (mouse)     |
| 120 | SGYLSARKIRSRFQTLVAQAVDKCSYRDVVKMADTSEVKLRIRERYVQITPAFKCTGI      | 179 | Q8UUZ1 (zebrafish) |
| 121 | SGYLSARKIRHRFQNIQAQLTTPQFSDYCKLLQDNTDVRVRVDDKYTVQITCAFRCNGI     | 180 | Q20054 (C elegans) |
|     | ***** ***:***:.. .: * *.: *.:*.:*.:*.:*.:*.*.***.*              |     |                    |
| 180 | WPRSAAQWPMPHIPWPGPNRVAEVKAEGFNLLSKECYSL----TGKQSSAESDAWVLFQF    | 234 | Q9Y586 (human)     |
| 180 | WPRSAAQWPMPHIPWPGPNRVAEVKAEGFNLLSKECYSL----TGKQSSAESDAWVLFQF    | 234 | Q8BPP1 (mouse)     |
| 180 | WPRSAAQWPMPHIPWPGPNRVAEVKAEGFNLLSKECYSL----TGKQSSAESDAWVLFQF    | 234 | Q8UUZ1 (zebrafish) |
| 181 | WPRSASHWPIAGLPWPAALANQTKAEGFDLTSRETAITQQNNPNKQASSMEADAWAMKM     | 240 | Q20054 (C elegans) |
|     | *****:.*: :*** . :*****: * :* . : * : * : * : * : * : * : * : * |     |                    |
| 235 | GEAENRLLMGGCRNKCLSVLKTLLDRHLELPGQPLNNYHMKTLLLYECEKHPRETDWDES    | 294 | Q9Y586 (human)     |
| 235 | GEAENRLLMGGCRNKCLSVLKTLLDRHLELPGQPLNNYHMKTLLLYECEKHPRETDWDEA    | 294 | Q8BPP1 (mouse)     |
| 235 | AEAENRLLMSGCRKCLSVLKTLLDRHLELPGQPLNNYHMKTLLLYECEKHPRETDWDES     | 294 | Q8UUZ1 (zebrafish) |
| 241 | HGAENML-LTGGRRKTLILKCLRDHMDFPPTVYILKTLVLYECEKHCSEYEWEDP         | 299 | Q20054 (C elegans) |
|     | *** * : * . * **:* * ** *.:** * . ** :***:***** * :*.:          |     |                    |
| 295 | CLGDRLNGILLQLISCLQRRCPHYFLPNLDFQGKPHSALESAAKQTWRLAREILTNP       | 354 | Q9Y586 (human)     |
| 295 | CLGDRLNGILLQLISCLQRRCPHYFLPNLDFQGKPHSALESAAKQTWRLAREILTNP       | 354 | Q8BPP1 (mouse)     |
| 295 | CLGDRLNGILLQLISCLQRRCPHYFLPNLDFQGKPHSALETAAKQTWRLAREILTNAK      | 354 | Q8UUZ1 (zebrafish) |
| 300 | NIGDRLVGIILLQLVSLQRRCAHYFLPSLDDLRSKPVHSIEHSAQLAWHLVRKLMIDPN     | 359 | Q20054 (C elegans) |
|     | :**** *****:***** *****.**:..** :*: *.: *:*.*:*. : : *          |     |                    |
| 355 | SLDKL                                                           | 359 | Q9Y586 (human)     |
| 355 | SLDKL                                                           | 359 | Q8BPP1 (mouse)     |
| 355 | SLDKL                                                           | 359 | Q8UUZ1 (zebrafish) |
| 360 | ALQSL                                                           | 364 | Q20054 (C elegans) |
|     | :*:.*                                                           |     |                    |

Figure S1 legend: Alignment of orthologous MAB21L2 proteins from human, mouse, zebrafish and C elegans showing cross species conservation of primary amino acid sequence. The residues in the sequences that are equivalent to those mutated in the human protein are indicated by the red highlight. The UniProt accession codes for each of the proteins is given to the right of the alignment. The alignment was performed on the UniProt web site using the default parameters.

**Figure S2 MAB21L2 lacks Nucleotidyl Transferase activity**

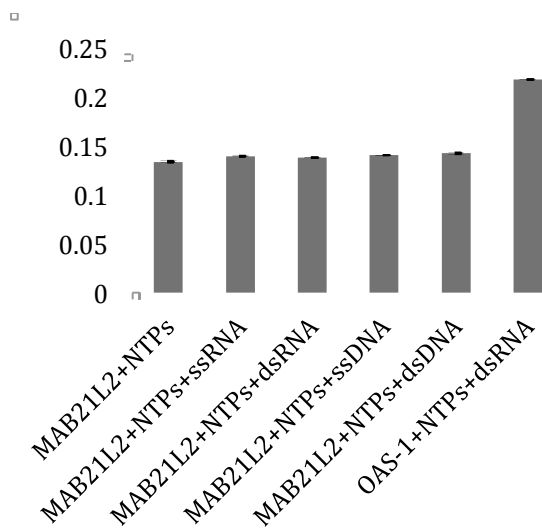

Figure S2 legend: A graph showing the absence of nucleotidyl transferase activity in MAB21L2 purified protein. OAS protein purified in the same way as MAB21L2 is a positive control and when incubated with an equal mixture of NTP (ATP, CTP, GTP, UTP) and double-stranded RNA (dsRNA) significant pyrophosphate release is detected indicating nucleotidyl transferase activity. MAB21L2 showed no activity above background with NTPs using dsRNA, dsDNA, single stranded RNA (ssRNA) or ssDNA as an activator. The error bars represent standard errors.

**Figure S3**

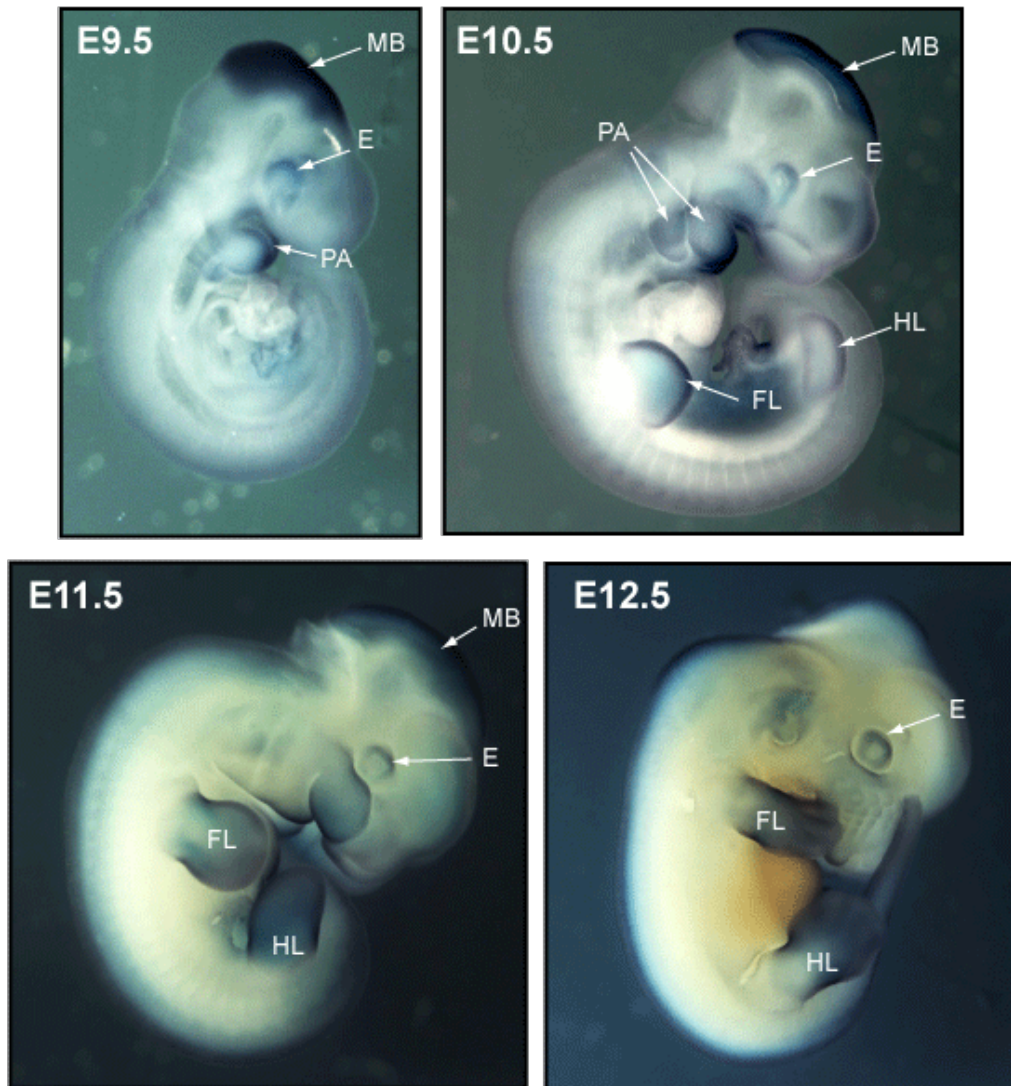

Figure S3. Developmental expression of *Mab21L2* in early mouse embryos at embryonic stage (E)9.5, E10.5, E11.5 and E12.5 by whole mount *in situ* hybridization showed specific expression domains at all stages. In particular, transcripts were identified in the developing eyes (E), forelimbs (FL), hindlimbs (HL), pharyngeal arches (PA) and midbrain (MB) regions. Midbrain expression was particularly strong at E9.5-E10.5.

Figure S4

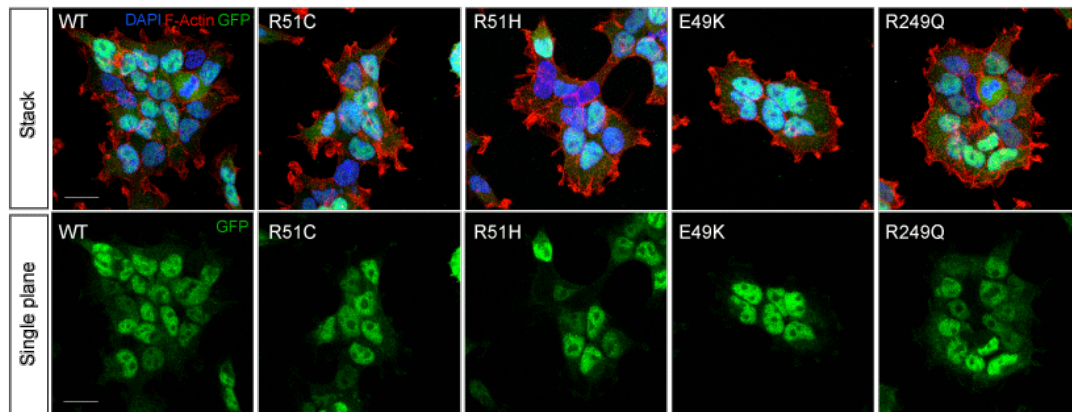

Figure S4: Immunofluorescence analyses with stacked (top) and single-plane (bottom) confocal microscopy images of MAB21L2-GFP stable cell lines indicated predominantly nuclear localization of WT and mutant MAB21L2-GFP (green) alleles with anti-GFP antibody (Clonetech Living Colours JL-8). Filamentous actin was stained red (Alexa Fluor 555-Phalloidin, Life Technologies) and DAPI (blue) was used to counterstained nuclei. Scale bar = 20  $\mu$ m.

Table S1 Shared Heterozygous Variants in Family 1463 and Homozygous Variants in Family 4468

| ID   | Gene    | genomic                     | mut          | Genotype | Consequence          | SIFT                | PolyPhen                 |
|------|---------|-----------------------------|--------------|----------|----------------------|---------------------|--------------------------|
| 1463 | ABCA6   | chr17 g.67084341C>A         | 1222G>V      | 0/1      | Missense             | deleterious(0.01)   | probably_damaging(0.998) |
| 1463 | ANKRD50 | chr4 g.125592016C>A         | 806A>S       | 0/1      | Missense             | tolerated(0.89)     | possibly_damaging(0.888) |
| 1463 | AURKB   | chr17 g.8109861C>G          | 212G>R       | 0/1      | Missense             | deleterious(0.01)   | probably_damaging(1)     |
| 1463 | CCDC87  | chr11 g.66359810T>C         | 226N>S       | 0/1      | Missense             | tolerated(0.25)     | benign(0.002)            |
| 1463 | CDH13   | chr16 g.82892049A>C         | 90E>A        | 0/1      | Missense             | tolerated(0.19)     | possibly_damaging(0.913) |
| 1463 | CHRNE   | chr17 g.4805555G>C          | 101P>A       | 0/1      | Missense             | deleterious(0.01)   | probably_damaging(0.998) |
| 1463 | CTU2    | chr16 g.88781064C>T         | 424T>I       | 0/1      | Missense             | tolerated(0.19)     | benign(0)                |
| 1463 | FAM196B | chr5 g.169310185G>A         | 240R>C       | 0/1      | Missense             | tolerated(0.06)     | benign(0)                |
| 1463 | FRMPD1  | chr9 g.37740753C>T          | 743T>I       | 0/1      | Missense             | tolerated(0.05)     | benign(0.059)            |
| 1463 | HMGB2   | chr4 g.174253258CTCATCT>C   | 199-201EDE>E | 0/1      | In-frame deletion    |                     |                          |
| 1463 | IFT122  | chr3 g.129207162CTTGG>C     | 690-691      | 0/1      | Frameshift coding    |                     |                          |
| 1463 | IFT122  | chr3 g.129207157GCTT>G      | 688-689AC>G  | 0/1      | In-frame deletion    |                     |                          |
| 1463 | IFT122  | chr3 g.129207169GTCACAGAC>G | 692-694      | 0/1      | Frameshift coding    |                     |                          |
| 1463 | IL12RB1 | chr19 g.18174698G>T         | 536R>S       | 0/1      | Missense             | deleterious(0.05)   | possibly_damaging(0.487) |
| 1463 | LIN9    | chr1 g.226496911C>T         | 127R>H       | 0/1      | Missense             | deleterious(0.01)   | unknown(0)               |
| 1463 | MAB21L2 | chr4 g.151504333G>A         | 51R>H        | 0/1      | Missense             | deleterious(0)      | probably_damaging(1)     |
| 1463 | METTL4  | chr18 g.2544214G>A          | 418S>L       | 0/1      | Missense             | deleterious(0)      | probably_damaging(1)     |
| 1463 | MUC4    | chr3 g.195512179G>A         | 2091         | 0/1      | Possible Missense    |                     |                          |
| 1463 | MVD     | chr16 g.88723943G>C         | 102L>V       | 0/1      | Missense             | tolerated(0.3)      | benign(0)                |
| 1463 | NEB     | chr2 g.152522837C>T         | 1600V>I      | 0/1      | Missense             | tolerated(0.25)     | probably_damaging(0.971) |
| 1463 | NLRC4   | chr2 g.32476662G>T          | 91H>N        | 0/1      | Missense             | tolerated(0.35)     | benign(0.073)            |
| 1463 | PSMB5   | chr14 g.23503876G>C         | 72           | 0/1      | Possible Missense    |                     |                          |
| 1463 | PTCHD3  | chr10 g.27703152G>T         | 10P>T        | 0/1      | Missense             |                     | benign(0)                |
| 1463 | SLC9A9  | chr3 g.143551039C>G         | 67R>P        | 0/1      | Missense             | deleterious(0)      | probably_damaging(0.999) |
| 1463 | SLCO2B1 | chr11 g.74873700G>C         | 6G>A         | 0/1      | Missense             | deleterious(0)      | probably_damaging(0.987) |
| 1463 | SPON1   | chr11 g.14279384G>A         | 477V>I       | 0/1      | Missense             | tolerated(0.38)     | possibly_damaging(0.619) |
| 1463 | TMEM116 | chr12 g.112371748G>C        | 133H>Q       | 0/1      | Missense             | tolerated(0.43)     | benign(0.174)            |
| 4468 | LTB4R2  | chr14 g.24780056GCA>G       | N149fs       | 1/1      | frameshift_deletion  |                     |                          |
| 4468 | MAB21L2 | chr4 g.151504921            | R247Q        | 1/1      | Missense             | deleterious(0.97)** | probably_damaging(1)     |
| 4468 | NXF3    | chrX g.102332646            | V494L        | 1        | Missense             |                     | neutral (0.24)           |
| 4468 | TMPRSS9 | chr19 g.2424094             | G818fs       | 1/1      | frameshift_insertion |                     |                          |

1/1 = homozygous; 1/0 = heterozygous; 1 = hemizygous; \*\* dbNSFP v1.3 annotates this variant with a SIFT Score (1-SIFT) of 0.97 and a prediction "Deleterious". dbNSFP v2.0 and dbNSFP v2.3 annotate this variant with a SIFT score of 0.14 (1-SIFT score = 0.86) and a "Tolerated" prediction. The current web version of SIFT ([http://provean.jcvi.org/genome\\_submit.php](http://provean.jcvi.org/genome_submit.php)) gives a SIFT score of 0.000 with a "Damaging" prediction and a PROVEAN score of -2.812 with a "Deleterious" prediction. Mutation taster and Polyphen2 predicted "disease causing" and "probably damaging", respectively.

Table S2: Clinical Features and Genotypes of Individuals with *MAB21L2* mutations

| Family<br>Proband(s)<br>chr4 genomic variant hg19<br>Mutation<br>Inheritance | 131<br>II.1<br>g.151504326G>A<br>c.145G>A p.(Glu49Lys)<br>unknown               |                                                                                 | 1463<br>III.1<br>g.151504333G>A<br>c.152G>A p.(Arg51His)<br>paternal |                                                                  | 676<br>II.1<br>g.151504332C>T<br>c.151C>T p.(Arg51Cys)<br>de novo |                                             | 4480<br>II.1<br>g.151504332C>T<br>c.151C>T p.(Arg51Cys)<br>de novo |                                                    | 4468<br>II.1<br>II.2<br>g.151504921G>A<br>c.[740G>A];[740G>A] p.[(Arg247Gln)];[(Arg247Gln)]<br>maternal & paternal – parents have normal eyes |                      |                                                            |                                                            |
|------------------------------------------------------------------------------|---------------------------------------------------------------------------------|---------------------------------------------------------------------------------|----------------------------------------------------------------------|------------------------------------------------------------------|-------------------------------------------------------------------|---------------------------------------------|--------------------------------------------------------------------|----------------------------------------------------|-----------------------------------------------------------------------------------------------------------------------------------------------|----------------------|------------------------------------------------------------|------------------------------------------------------------|
|                                                                              | Sex                                                                             | Genotype                                                                        | Birth Weight [z score]                                               | Maternal/Paternal Age at birth                                   | Age at last assessment                                            | Height[z score]                             | Weight[z score]                                                    | OFC[z score]                                       | Male<br>heterozygous                                                                                                                          | Male<br>homozygous   | Male<br>homozygous                                         | Male<br>homozygous                                         |
|                                                                              | Male                                                                            | heterozygous                                                                    | NR                                                                   | 33/37                                                            | 39 y                                                              | NR                                          | NR                                                                 | 60 cm [+1.8]                                       | Male<br>heterozygous                                                                                                                          | Male<br>homozygous   | Male<br>homozygous                                         | Male<br>homozygous                                         |
|                                                                              | Male                                                                            | heterozygous                                                                    | 3033g @ 40 [-1.1]                                                    | 24/30                                                            | 13 y                                                              | 154.9cm [-0.29]                             | 63.5kg [+1.73]                                                     | NR                                                 | Female<br>heterozygous                                                                                                                        | Male<br>heterozygous | Male<br>homozygous                                         | Male<br>homozygous                                         |
|                                                                              |                                                                                 |                                                                                 |                                                                      |                                                                  |                                                                   |                                             |                                                                    |                                                    | 3260g@38                                                                                                                                      | 3360 g               | NR                                                         | 3900g @ 40 [+0.88]                                         |
|                                                                              |                                                                                 |                                                                                 |                                                                      |                                                                  |                                                                   |                                             |                                                                    |                                                    | NR/NR                                                                                                                                         | 30/33                | 18/NR                                                      | 20/NR                                                      |
|                                                                              |                                                                                 |                                                                                 |                                                                      |                                                                  |                                                                   |                                             |                                                                    |                                                    | 10 y                                                                                                                                          | 24 y                 | 5y                                                         | 3y                                                         |
|                                                                              |                                                                                 |                                                                                 |                                                                      |                                                                  |                                                                   |                                             |                                                                    |                                                    | 100cm[-6.7]                                                                                                                                   | 121 cm [-8.3]        | 112cm [-0.07]                                              | 97cm [+0.44]                                               |
|                                                                              |                                                                                 |                                                                                 |                                                                      |                                                                  |                                                                   |                                             |                                                                    |                                                    | NR                                                                                                                                            | 52 kg [-2.9]         | 17.5kg [-0.92]                                             | 13.8kg [-0.55]                                             |
|                                                                              |                                                                                 |                                                                                 |                                                                      |                                                                  |                                                                   |                                             |                                                                    |                                                    | 57 cm [+2.59 SD]                                                                                                                              | 55 cm [-1.1]         | 51cm [-1.2]                                                | 48cm [-2.4]                                                |
| <b>Eye</b>                                                                   | R                                                                               | L                                                                               | R                                                                    | L                                                                | R                                                                 | L                                           | R                                                                  | L                                                  | R                                                                                                                                             | L                    | R                                                          | L                                                          |
| <i>Anophthalmia</i>                                                          | -                                                                               | -                                                                               | -                                                                    | -                                                                | +                                                                 | +                                           | +                                                                  | +                                                  | -                                                                                                                                             | -                    | -                                                          | -                                                          |
| <i>Microphthalmia</i>                                                        | +                                                                               | +                                                                               | +                                                                    | +                                                                | N/A                                                               | N/A                                         | N/A                                                                | N/A                                                | -                                                                                                                                             | -                    | -                                                          | -                                                          |
| <i>Coloboma</i>                                                              | +                                                                               | +                                                                               | +                                                                    | ?                                                                | N/A                                                               | N/A                                         | N/A                                                                | N/A                                                | +                                                                                                                                             | +                    | +                                                          | +                                                          |
| <i>Microcornea</i>                                                           | +                                                                               | +                                                                               | +                                                                    | ?                                                                | N/A                                                               | N/A                                         | N/A                                                                | N/A                                                | -                                                                                                                                             | -                    | -                                                          | -                                                          |
| <i>Sclerocornea</i>                                                          | -                                                                               | -                                                                               | -                                                                    | +                                                                | N/A                                                               | N/A                                         | N/A                                                                | N/A                                                | -                                                                                                                                             | -                    | -                                                          | -                                                          |
| <i>Vision</i>                                                                | None                                                                            | None                                                                            | 6/60                                                                 | None                                                             | None                                                              | None                                        | None                                                               | None                                               | Yes                                                                                                                                           | Yes                  | Yes                                                        | Yes                                                        |
| <b>Skeletal</b>                                                              |                                                                                 |                                                                                 |                                                                      |                                                                  |                                                                   |                                             |                                                                    |                                                    |                                                                                                                                               |                      |                                                            |                                                            |
| <i>Rhizomelia</i>                                                            | No                                                                              | No                                                                              | No                                                                   | No                                                               | Severe Bilateral                                                  | Severe Bilateral                            | Arms & legs                                                        | Arms & legs                                        | None                                                                                                                                          | None                 | None                                                       | None                                                       |
| <i>Joint contractures</i>                                                    | No                                                                              | No                                                                              | Knees & Hips Bilaterally                                             | Knees & Hips Bilaterally                                         | All large joints                                                  | All large joints                            | All large joints                                                   | All large joints                                   | None                                                                                                                                          | None                 | None                                                       | None                                                       |
| <i>Hypoplastic femoral condyles</i>                                          | Unknown                                                                         | Unknown                                                                         | Bilateral                                                            | Bilateral                                                        |                                                                   |                                             | Yes                                                                | Yes                                                | None                                                                                                                                          | None                 | None                                                       | None                                                       |
| <i>Details</i>                                                               | Recurrent patella dislocations, 3/4 syndactyly of hands, 2/3 syndactyly of feet | Recurrent patella dislocations, 3/4 syndactyly of hands, 2/3 syndactyly of feet | Bowing of both legs noted as infant, calf wasting and pes planus     | Bowing of both legs noted as infant, calf wasting and pes planus | Short truck, normal sized hands and feet                          | Short truck, normal sized hands and feet    | Short humeri and femora, short tibiae, thin radius                 | Short humeri and femora, short tibiae, thin radius | None                                                                                                                                          | None                 | Mild shortness of the long bones with decreased tubulation | Mild shortness of the long bones with decreased tubulation |
| <b>Other</b>                                                                 |                                                                                 |                                                                                 |                                                                      |                                                                  |                                                                   |                                             |                                                                    |                                                    |                                                                                                                                               |                      |                                                            |                                                            |
| <i>Hypospadias</i>                                                           | No                                                                              | No                                                                              | +                                                                    | +                                                                | N/A                                                               | N/A                                         | No                                                                 | No                                                 | No                                                                                                                                            | No                   | No                                                         | No                                                         |
| <i>Undescended testes</i>                                                    | Bilateral                                                                       | Bilateral                                                                       | No                                                                   | No                                                               | N/A                                                               | N/A                                         | No                                                                 | No                                                 | No                                                                                                                                            | No                   | No                                                         | No                                                         |
| <i>Precocious Puberty</i>                                                    | No                                                                              | No                                                                              | No                                                                   | No                                                               | 7 years                                                           | 7 years                                     | No                                                                 | No                                                 | No                                                                                                                                            | No                   | No                                                         | No                                                         |
| <i>Intellectual disability</i>                                               | None                                                                            | None                                                                            | None                                                                 | None                                                             | Moderate ID with autistic spectrum disorder                       | Moderate ID with autistic spectrum disorder | Moderate                                                           | Moderate                                           | None                                                                                                                                          | None                 | None                                                       | None                                                       |
| <i>Other features</i>                                                        |                                                                                 |                                                                                 |                                                                      |                                                                  |                                                                   |                                             |                                                                    |                                                    | Strabismus on left, facial dysmorphism                                                                                                        |                      | Strabismus on right, facial dysmorphism                    |                                                            |

NR = not recorded; N/A = not applicable; + = feature present; - = feature not present

**Table S3: List of candidate genes used in UK10K exome analysis:**

Inclusion criteria for this were; site- and stage-specific expression during early eye development in mouse embryos AND/OR the observation of a major eye malformation in any vertebrate animal model AND/OR mutation identification in humans with major eye malformations.

| <b>Gene symbol</b>           | <b>Gene name</b>                                                                     | <b>MIM number</b>                                                           |
|------------------------------|--------------------------------------------------------------------------------------|-----------------------------------------------------------------------------|
| <i>ATOH1 (MATH1)</i>         | atonal homolog 1 (Drosophila)                                                        | <a href="#">601461</a>                                                      |
| <i>ATOH7 (MATH5)</i>         | atonal homolog 7 (Drosophila)                                                        | <a href="#">609875</a>                                                      |
| <i>BMP4</i>                  | bone morphogenetic protein 4                                                         | <a href="#">112262</a>                                                      |
| <i>BMP7</i>                  | bone morphogenetic protein 7                                                         | <a href="#">112267</a>                                                      |
| <i>FGF10</i>                 | fibroblast growth factor 10                                                          | <a href="#">602115</a>                                                      |
| <i>FGF19 (Fgf15)</i>         | fibroblast growth factor 19                                                          | <a href="#">603891</a>                                                      |
| <i>HES1</i>                  | hes family bHLH transcription factor 1                                               | <a href="#">139605</a>                                                      |
| <i>HESX1</i>                 | HESX homeobox 1                                                                      | <a href="#">601802</a>                                                      |
| <i>LHX1</i>                  | LIM homeobox 1                                                                       | <a href="#">601999</a>                                                      |
| <i>MAB3: 21L1</i>            | mab-21-like 1 (C. elegans)                                                           | <a href="#">601280</a>                                                      |
| <i>MAB21L2</i>               | mab-21-like 2 (C. elegans)                                                           | <a href="#">604357</a>                                                      |
| <i>MAF1</i>                  | MAF1 homolog (S. cerevisiae)                                                         | <a href="#">610210</a>                                                      |
| <i>mbx1</i>                  | MADS-box transcription factor Mbx1                                                   | N/A ( <i>S. pombe</i> )                                                     |
| <i>NEUROG2 (NGN2)</i>        | neurogenin 2                                                                         | <a href="#">606624</a>                                                      |
| <i>OTX1</i>                  | orthodenticle homeobox 1                                                             | <a href="#">600036</a>                                                      |
| <i>OTX2</i>                  | orthodenticle homeobox 2                                                             | <a href="#">600037</a>                                                      |
| <i>PAX2</i>                  | paired box 2                                                                         | <a href="#">167409</a>                                                      |
| <i>PAX6</i>                  | paired box 6                                                                         | <a href="#">607108</a>                                                      |
| <i>POU4F1</i>                | POU class 4 homeobox 1                                                               | <a href="#">601632</a>                                                      |
| <i>POU4F2</i>                | POU class 4 homeobox 2                                                               | <a href="#">113725</a>                                                      |
| <i>RAX</i>                   | retina and anterior neural fold homeobox                                             | <a href="#">601881</a>                                                      |
| <i>RXR: RXRA; RXRB; RXRG</i> | retinoid X receptor, alpha; retinoid X receptor, beta;<br>retinoid X receptor, gamma | <a href="#">180245</a> ; <a href="#">180246</a> ;<br><a href="#">180247</a> |
| <i>SOX1</i>                  | SRY (sex determining region Y)-box 1                                                 | <a href="#">602148</a>                                                      |
| <i>SOX2</i>                  | SRY (sex determining region Y)-box 2                                                 | <a href="#">184429</a>                                                      |
| <i>SOX3</i>                  | SRY (sex determining region Y)-box 3                                                 | <a href="#">313430</a>                                                      |
| <i>SOX14</i>                 | SRY (sex determining region Y)-box 14                                                | <a href="#">604747</a>                                                      |
| <i>SOX21</i>                 | SRY (sex determining region Y)-box 21                                                | <a href="#">604974</a>                                                      |
| <i>SHH</i>                   | sonic hedgehog                                                                       | <a href="#">600725</a>                                                      |
| <i>SIX3</i>                  | SIX homeobox 3                                                                       | <a href="#">603714</a>                                                      |
| <i>SIX6</i>                  | SIX homeobox 6                                                                       | <a href="#">606326</a>                                                      |
| <i>STRA6</i>                 | stimulated by retinoic acid 6                                                        | <a href="#">610745</a>                                                      |
| <i>TBX2</i>                  | T-box 2                                                                              | <a href="#">600747</a>                                                      |
| <i>TBX3</i>                  | T-box 3                                                                              | <a href="#">601621</a>                                                      |
| <i>TBX5</i>                  | T-box 5                                                                              | <a href="#">601620</a>                                                      |
| <i>VAX1</i>                  | ventral anterior homeobox 1                                                          | <a href="#">604294</a>                                                      |
| <i>VAX2</i>                  | ventral anterior homeobox 2                                                          | <a href="#">604295</a>                                                      |
| <i>VSX1</i>                  | visual system homeobox 1                                                             | <a href="#">605020</a>                                                      |
| <i>VSX2 (CHX10)</i>          | visual system homeobox 2                                                             | <a href="#">142993</a>                                                      |



**Table S4 Coverage and Depth of Exome Sequencing**

| <b>Family</b> | <b>Median Depth</b> | <b>Coverage at &gt;8X</b> |
|---------------|---------------------|---------------------------|
| <b>4468</b>   | 97-112x             | 90-93%                    |
| <b>676</b>    | 49-102X             | >94%                      |
| <b>1463</b>   | 110-112X            | >90%                      |
